# Supplementary material
Source: publisher figshare collection journal article supplement (https://acs.figshare.com/ndownloader/files/15103793)
Supplement: Supplementary file 1 [file 15103793]

# Supporting Information

## Re-dispersion of Mo-based Catalysts and the Rational Design of Super

### Small-sized Metallic Mo Species

Jiayi Chen<sup>1</sup>, Haiyan Wang<sup>1</sup>, Zhe Wang<sup>1</sup>, Shanjun Mao<sup>1</sup>, Jian Yu<sup>2</sup>, Yong Wang<sup>2</sup> and Yong Wang<sup>1\*</sup>

<sup>1</sup>Advanced Materials and Catalysis Group, Institute of Catalysis, Department of Chemistry, Zhejiang University, Hangzhou 310028, P. R. China.

<sup>2</sup>Center of Electron Microscopy and State Key Laboratory of Silicon Materials, School of Materials Science and Engineering, Zhejiang University, Hangzhou 310027, P. R. China.

\*Corresponding author at: Advanced Materials and Catalysis Group, Institute of Catalysis, Zhejiang University, Hangzhou 310028, P. R. China.

E-mail address: chemwy@zju.edu.cn.

#### **This PDF file includes:**

Experiment section

Figure S1 to S15

Table S1 to S2

References

## EXPERIMENTAL

### Materials

Potassium hydroxide (KOH) and concentrated hydrochloric acid (HCl) were obtained from Sinopharm Chemical Reagent Co., Ltd. Sodium hydroxide (NaOH), sodium salicylate ( $C_7H_5NaO_3$ , AR,  $\geq 99.5\%$ ), sodium nitroferricyanide dehydrate, sodium hypochlorite solution (5.0%) and dopamine hydrochloride were purchased from Aladdin. All chemicals without any further treatment were analytical. Commercial CC (carbon cloths, HCCP330) was purchased from Shanghai Hesen Electric Co. Ltd., China.

### Electrochemical Measurements

#### Determination of ammonia

**Spectrophotometry measurement with salicylic method<sup>1</sup>:** 6.404 g sodium salicylate and 1.28 g sodium hydroxide dissolved in 1000 mL deionized water which was used as coloring solution; A mixture of 8 mL sodium hypochlorite (5 wt %), 3 g sodium hydroxide and 100 mL deionized water was used as a oxidation reagent; 0.1g  $Na_2[Fe(CN)_5NO] \cdot 2H_2O$  diluted to 10 ml with deionized water was used as catalyst reagent. Standard ammonium solution in the alkaline solution as follow: 4 mL of sample was taken. Then 50  $\mu$ L of oxidizing solution, 4 mL  $H_2O$ , 500  $\mu$ L of colouring solution and 50  $\mu$ L of catalyst solution were added respectively to the sample solution. Standard ammonium solution in the acid solution as follow: 4 mL of sample was taken. Then 4 mL  $H_2O$ , 1 mL KOH (1 M), 50  $\mu$ L of oxidizing solution, 500  $\mu$ L of colouring solution, 50  $\mu$ L of catalyst solution were added respectively to the sample solution. Absorbance

measurements were performed after 1 hour at  $\lambda = 670$  nm. The calibration curve below was used to calculate the ammonia concentration.

#### **Spectrophotometry measurement with Nessler reagent in the alkaline solution<sup>2</sup>:**

NH<sub>4</sub>Cl solutions with various concentrations were placed in the test tubes. Then KOH solution (0.1 M) were added to each test tube until the volume reached 10 mL. 1 mL sodium potassium tartrate (0.2 M) and 1 mL of Nessler reagent were added to each test tube one after another. Absorbance measurements were performed after 20 min at  $\lambda = 425$  nm. The calibration curve below was used to calculate the ammonia concentration (Figure S13).

#### **Determination of hydrazine**

The hydrazine present in the electrolyte was estimated by the method of Di Bao and Qi Zhang.<sup>3</sup> A mixture of 5.99 g para-(dimethylamino) benzaldehyde, 300 mL ethanol and 30 mL HCl (concentrated) was used as a color reagent. Calibration curve in the alkaline solution was plotted as follow: First, preparing a series of reference solutions and 3 mL of sample was taken; Second, adding 2 mL H<sub>2</sub>O and 5 mL above prepared color reagent were added respectively to the sample solution, and then stirring 10 min at room temperature. Last, the absorbance of the resulting solution was measured at 456 nm. Calibration curve in the acid solution was plotted as follow: 2 mL of sample was taken. Then 2 mL H<sub>2</sub>O, 1 mL KOH (1 M) and 5 mL color reagent were added respectively to the sample solution, and then stirring 10 min at room temperature. Last, the absorbance of the resulting solution was measured at 456 nm.

## Faradaic efficiency

The Faradaic efficiency for NRR was defined as the quantity of electric charge used for synthesizing ammonia divided by the total charge passed through the electrodes during the electrolysis. The total amount of  $\text{NH}_3$  produced was measured using colorimetric methods. Assuming three electrons were needed to produce one  $\text{NH}_3$  molecule. The Faradaic efficiency could be calculated as follows:  $\text{FE} = 3F \times [\text{NH}_3] / (17 \times Q)$ , where  $F$  is the Faraday constant,  $[\text{NH}_3]$  is the concentration and  $Q$  is total charge passed through the electrodes during the reaction duration according to the total current density. The rate of ammonia formation was calculated using the following equation:  $R_{\text{NH}_3} = [\text{NH}_3] / t \times m$ , where  $t$  is the reduction reaction time (h) and  $m$  is the loading mass of catalysts ( $\text{mg cm}^{-1}$ ).

## Computational Methods

All the theoretical calculations were performed using a plane-wave technique implemented in Vienna ab initio simulation package (VASP)<sup>4, 5</sup> and the revised PBEsol functional.<sup>6</sup> PBEsol functional was used as exchange-correlation functional approximation. The electron-ion interactions were expounded by the projector augmented wave (PAW) approach presented by Blöchl<sup>7</sup> and carried out by Kresse<sup>8</sup> and a plane-wave cutoff energy of 400 eV was used. A Monkhorst–Pack k-point mesh of  $4 \times 4 \times 1$  and  $2 \times 2 \times 1$  were used for the Brillouin zone sampling during electronic structure calculation and the structure optimization, respectively. The vacuum space along the  $z$  direction was set to be 15 Å and the periodic condition was employed along the  $x$  and

y directions. All atoms in the supercell are allowed to relax during the structure optimization except the bottom layer atoms of graphene. The relaxation was stopped when the force residue on the atom was smaller than 0.02 eV/Å. The adsorption energy for metal nanoparticles is defined as

$$E_{\text{ads}} = E_{\text{tot}} - E_{\text{slab}} - E_{\text{metal}}$$

where  $E_{\text{tot}}$  is the total energy of support and metal nanoparticle,  $E_{\text{slab}}$  is the energy of the clean support alone, and  $E_{\text{metal}}$  is the energy of metal nanoparticle.

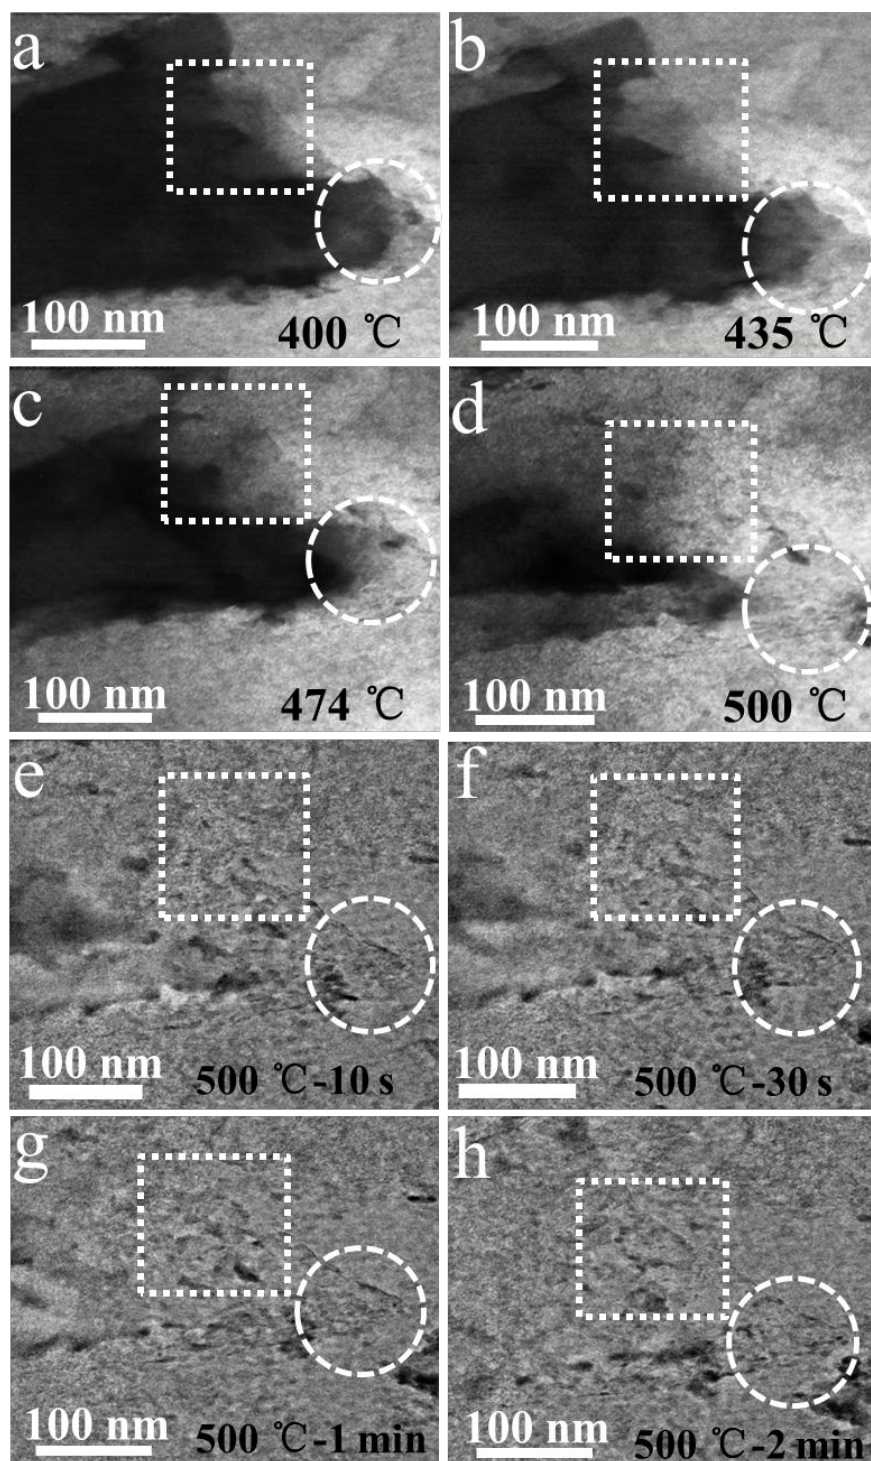

**Figure S1** In-situ HRTEM images of the reduction of MoO<sub>2</sub>/CC@CN in hydrogen starting 400 °C to 500 °C and then occurring at 500 °C for 5 min. (a) 400 °C, (b) 435 °C, (c) 474 °C, (d) 500 °C, (e) 500 °C for 10 s, (f) 500 °C for 30 s, (g) 500 °C for 1 min, (h) 500 °C for 2 min

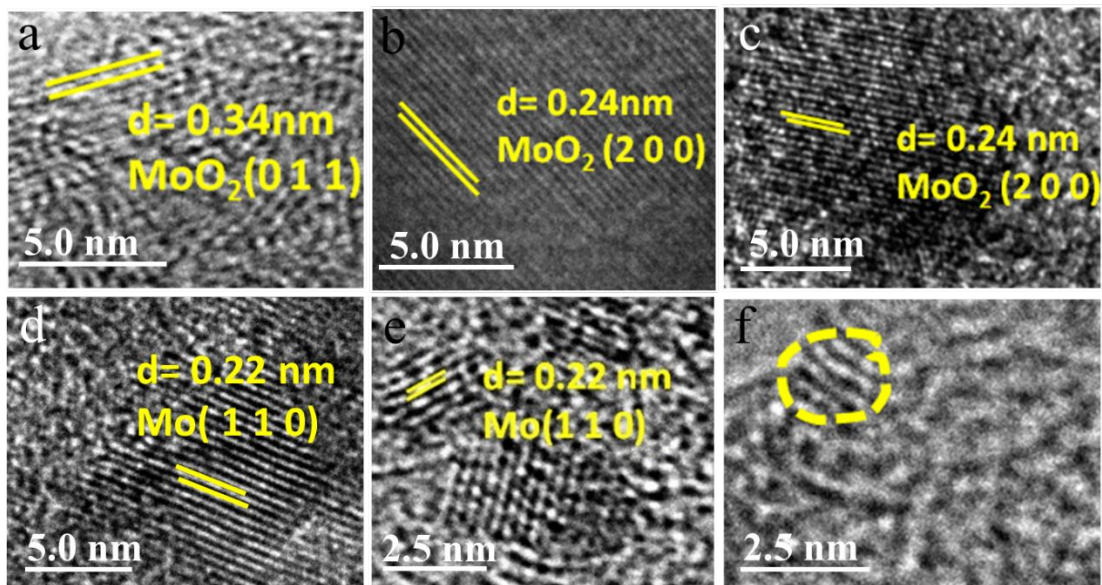

**Figure S2** HRTEM images of (a)  $\text{MoO}_2/\text{CC}@\text{CN}$ , (b)  $\text{MoO}_2\text{-}400\text{ }^\circ\text{C}\text{-}1\text{h}/\text{CC}@\text{CN}$ , (c)  $\text{MoO}_2\text{-}450\text{ }^\circ\text{C}\text{-}1\text{h}/\text{CC}@\text{CN}$ , (d)  $\text{Mo}\text{-}500\text{ }^\circ\text{C}\text{-}5\text{min}/\text{CC}@\text{CN}$ , (e)  $\text{Mo}\text{-}500\text{ }^\circ\text{C}\text{-}1\text{h}/\text{CC}@\text{CN}$  and (f)  $\text{Mo}\text{-}500\text{ }^\circ\text{C}\text{-}8\text{h}/\text{CC}@\text{CN}$ .

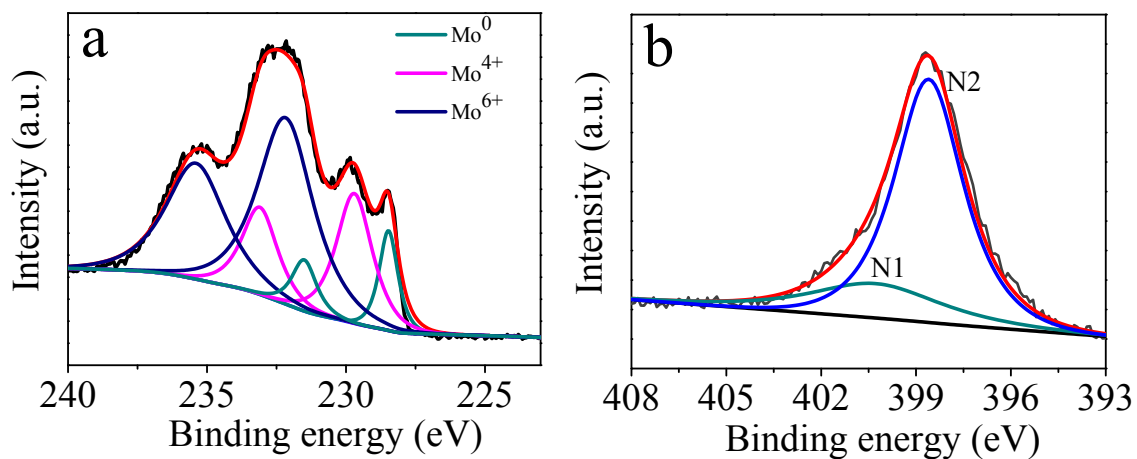

**Figure S3** (a) and (b) The Mo 3d and N 1s XPS fine scan spectrum of  $\text{Mo}\text{-}500\text{ }^\circ\text{C}\text{-}8\text{h}/\text{CC}@\text{CN}$  (N1: pyrrolic N, N2: pyridinic N), respectively.

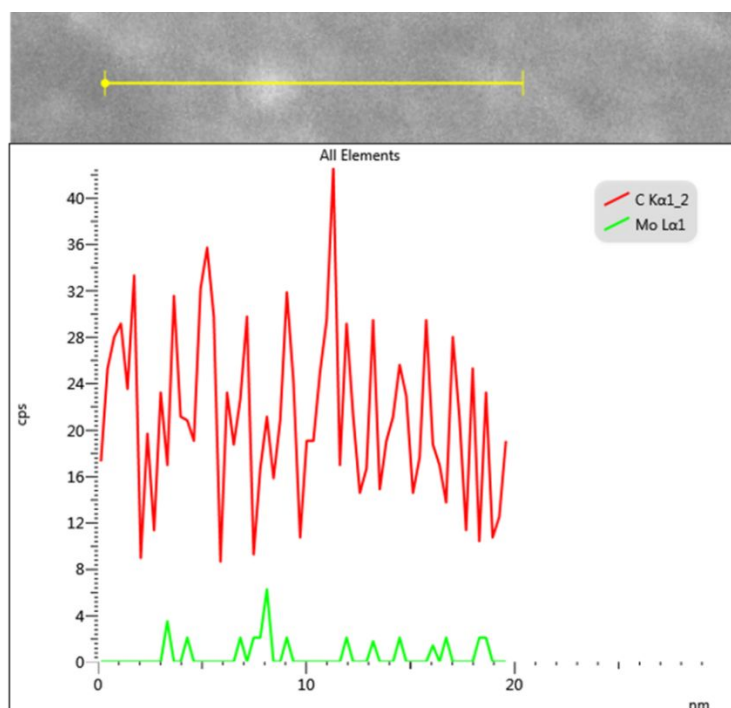

**Figure S4** STEM-EELS line scan crossing a Mo-500 °C-10h/ACC-600.

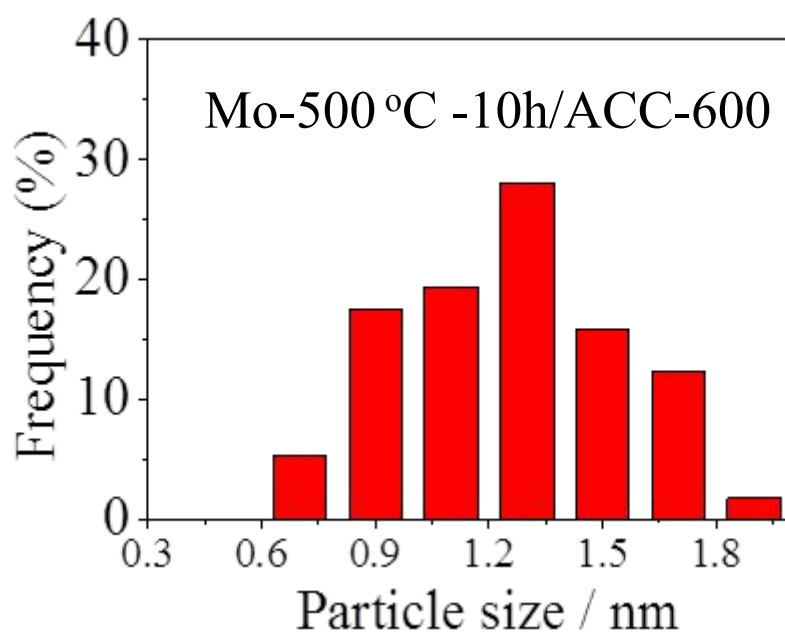

**Figure S5** Mo nanoparticle size distribution of Mo-500 °C-10h/ACC-600.



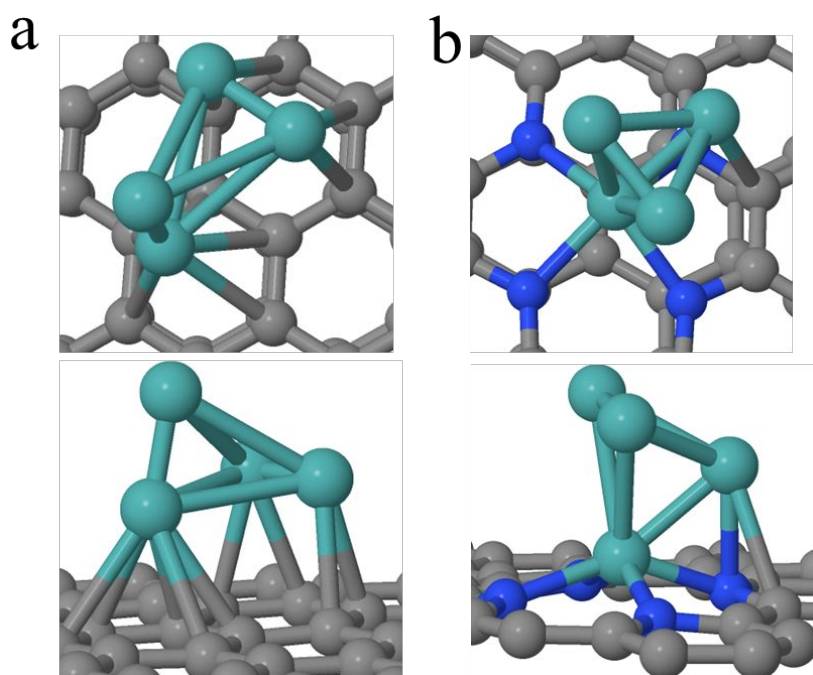

**Figure S6** The top and side images of Mo-cluster on (a) graphene and (b) doped-N graphene (Mo: green; C: gray; N: blue)

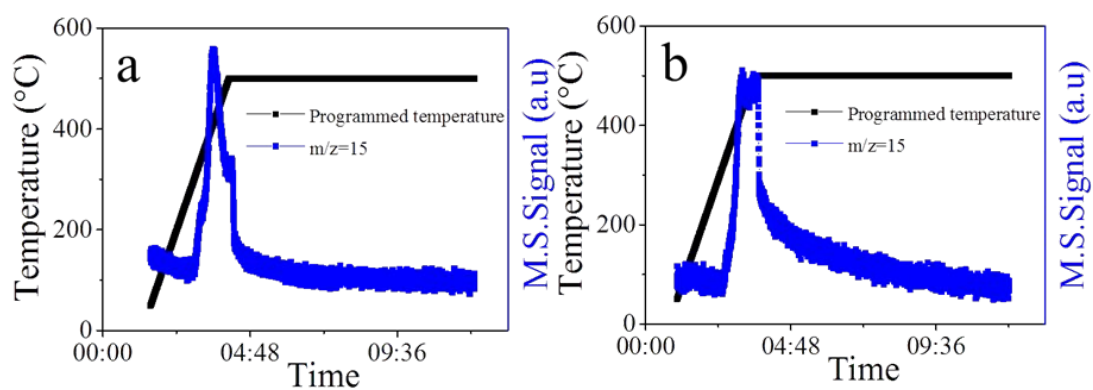

**Figure S7** (a) and (b)  $\text{H}_2$ -TPR-MS patterns of  $\text{MoO}_2/\text{CC@CN}$  and  $\text{MoO}_2/\text{ACC-600}$ , respectively: mass spectra for  $\text{CH}_4$ .

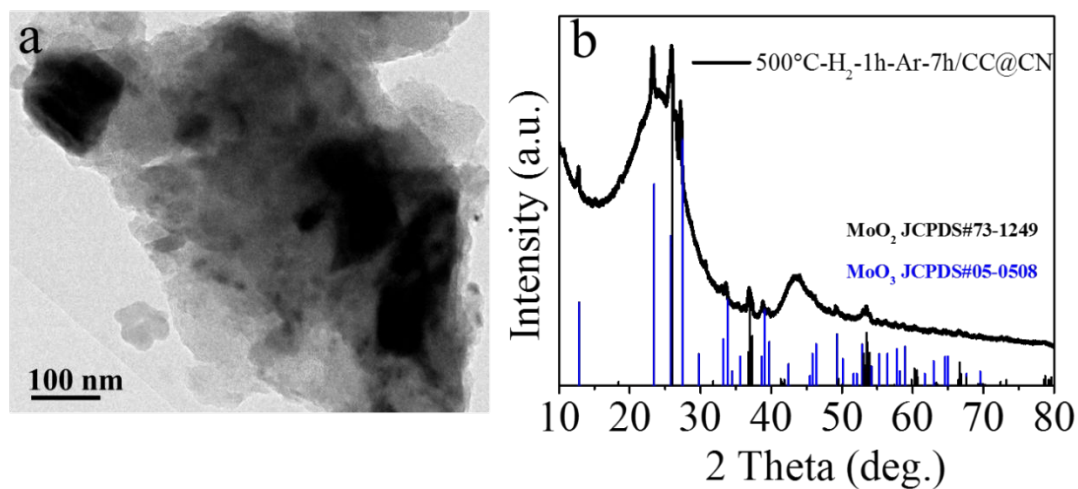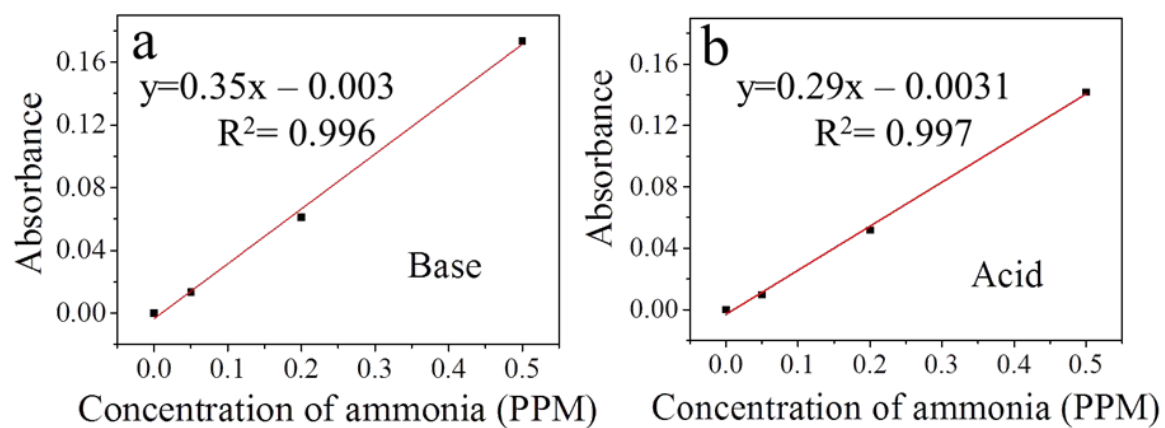

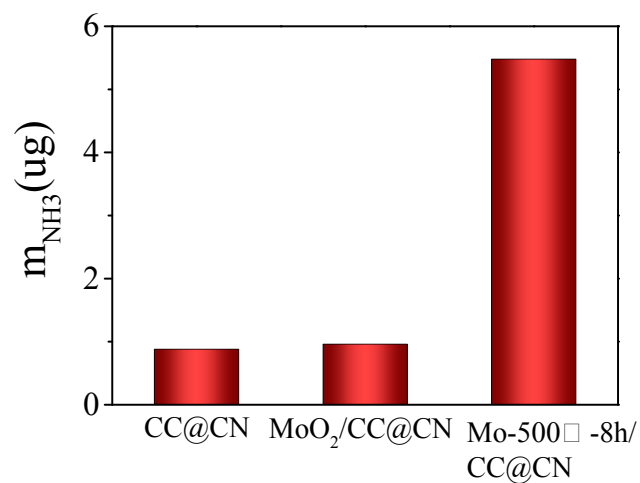

**Figure S10** The amount of NH<sub>3</sub> with CC@CN, MoO<sub>2</sub>/CC@CN and Mo-500 °C-8h/CC@CN electrode after 3h electrolysis at 0 V under ambient conditions, respectively.

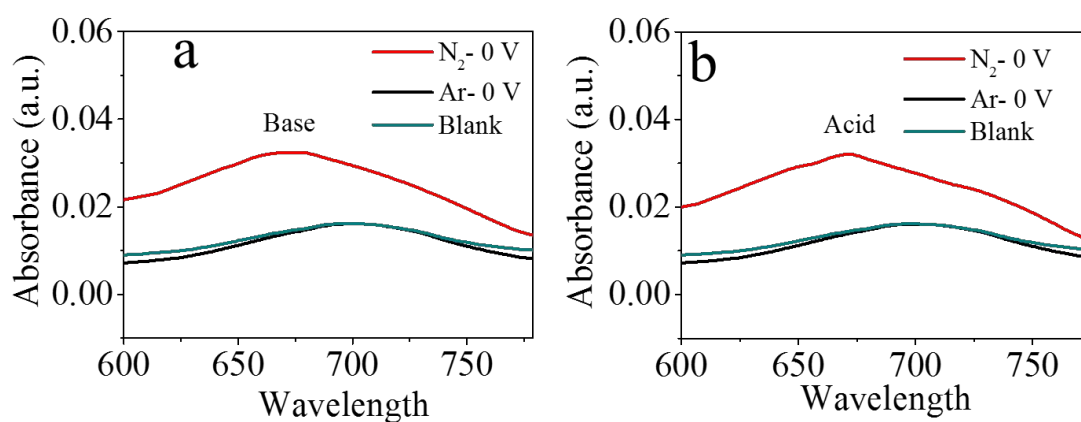

**Figure S11** (a) and (b) UV-vis absorption spectra after potentiostatic tests in N<sub>2</sub> and Ar at 0 V versus RHE in base and acid, respectively.

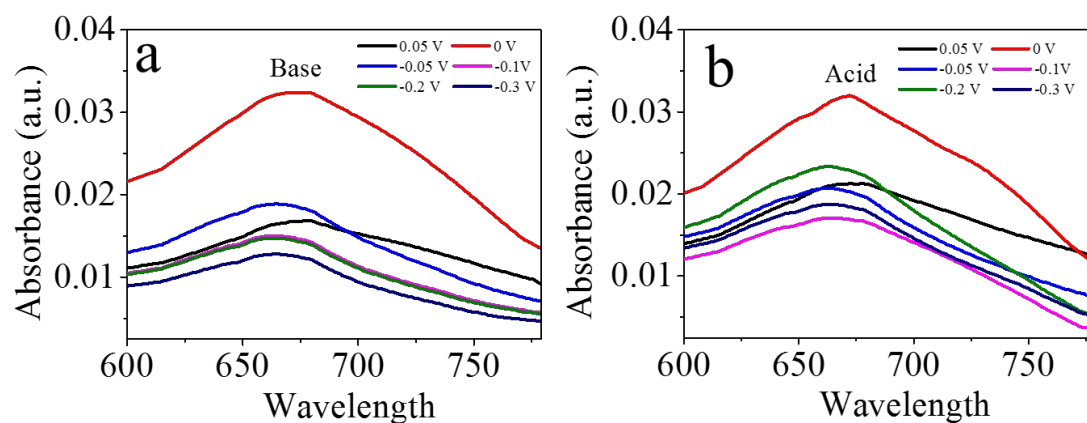

**Figure S12** (a) and (b) Comparison of absorbance spectra at different potential in  $N_2$  in base and acid, respectively.

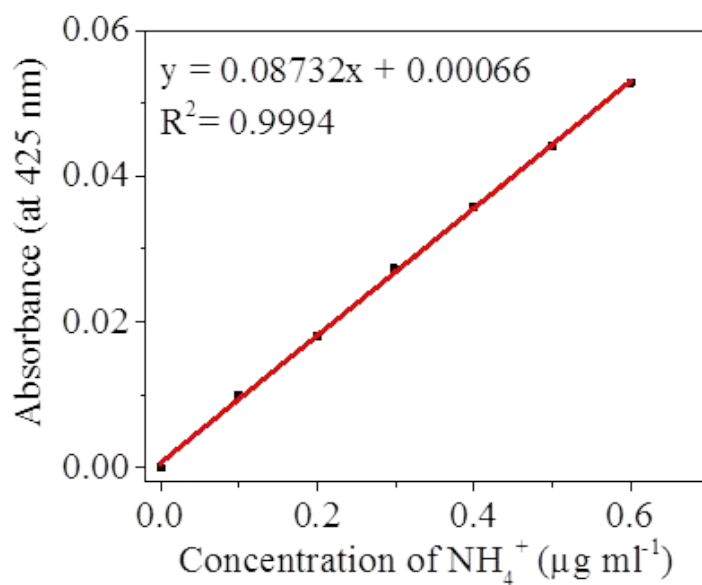

**Figure S13** Calibration curve used for estimation of  $NH_3$  in base using Nessler reagent.

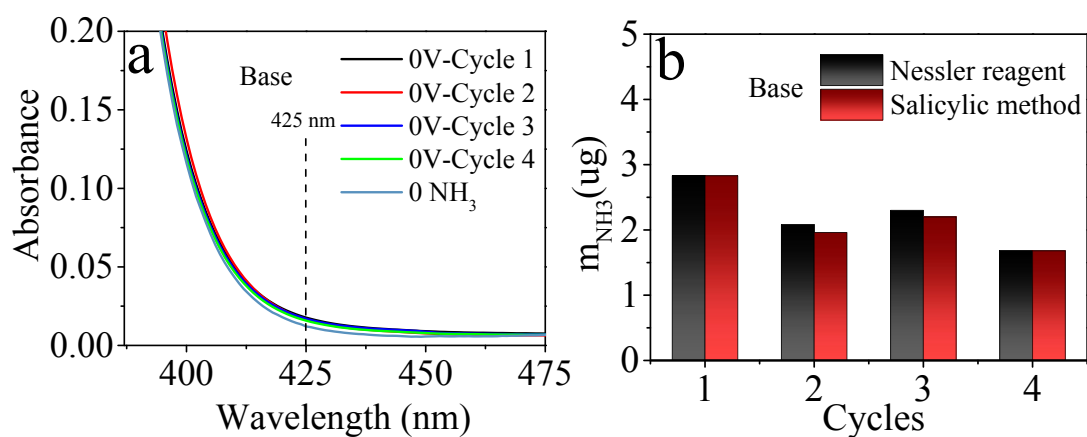

**Figure S14** (a) Absorbance spectra of cycling test of Mo-500 °C-8h/CC@CN in base using Nessler reagent. (b) The amount of NH<sub>3</sub> with Mo-500 °C-8h/ CC@CN electrode after 3h electrolysis at 0 V under ambient conditions in base by Nessler reagent and Salicylic method, respectively.

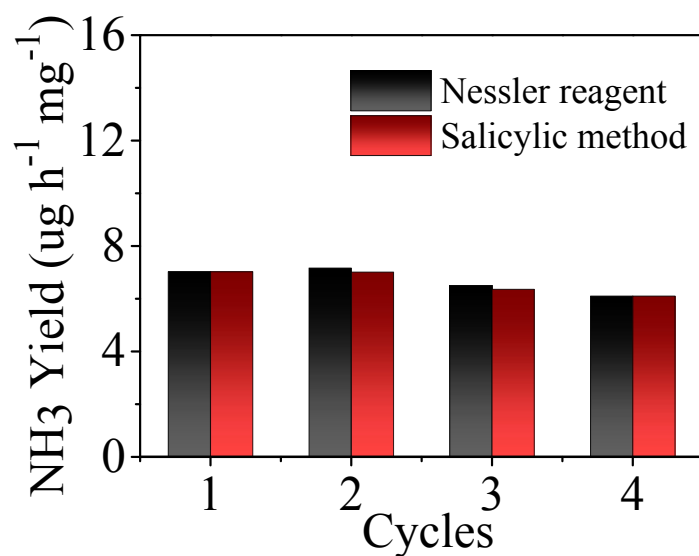

**Figure S15** Yield of NH<sub>3</sub> with cycling test of Mo-500 °C-8h/CC@CN used by Nessler reagent and Salicylic method, respectively .

**Table S1.** The contents of Mo and N for Mo-500 °C-8h/CC@CN

| Mo-500 °C-8h/CC@CN | Mo % | N %  |
|--------------------|------|------|
| Before calcination | 1.35 | 0.27 |
| After reduction    | 1.34 | 0.19 |

**Table S2** Summary of the representative reports on N<sub>2</sub> fixation.

| Process                 | System/Catalyst                                                          | Conditions                                | Yield                                                                                                     | Testing Method                                      | Reference        |
|-------------------------|--------------------------------------------------------------------------|-------------------------------------------|-----------------------------------------------------------------------------------------------------------|-----------------------------------------------------|------------------|
| <b>Harsh condition</b>  | Ru (7.8 wt%)-loaded Y <sub>5</sub> Si <sub>3</sub>                       | 400 °C                                    | 1.9 mmol g <sup>-1</sup> h <sup>-1</sup>                                                                  | Ion chromatography                                  | Ref. 9           |
|                         | Fe <sub>2</sub> O <sub>3</sub> /AC (Molten hydroxide)                    | 250 °C, atmospheric pressure              | 8.27 × 10 <sup>-9</sup> mol s <sup>-1</sup> cm <sup>-2</sup>                                              | Salicylic method                                    | Ref. 10          |
|                         | Fe/Ru-based catalysts                                                    | 350~550 °C, 200~300 atm                   | ~20% (N <sub>2</sub> conversion rate)                                                                     | ----                                                | Ref. 11          |
| <b>Electrocatalysis</b> | Pt plate/0.1 M KOH/ N <sub>2</sub> , Mo-500 °C -8h/CC@CN                 | room temperature and atmospheric pressure | 7.03 ug h <sup>-1</sup> mg <sup>-1</sup> and 22.3% FE                                                     | Salicylic method                                    | <b>This work</b> |
|                         | Pt plate/0.1 M HCl/ N <sub>2</sub> , Au-TiO <sub>2</sub> sub-nanocluster | room temperature and atmospheric pressure | 8.11% (current efficiency)                                                                                | Indophenol blue method                              | Ref. 12          |
|                         | graphite plate/0.1 M KOH/ N <sub>2</sub> , Au                            | room temperature and atmospheric pressure | 1.648 ug h <sup>-1</sup> cm <sup>-2</sup> (NH <sub>3</sub> )<br>0.102 ug h <sup>-1</sup> cm <sup>-2</sup> | Nessler's reagent and Ammonia colorimetric assaykit | Ref. 3           |

|                       |                                                                                   |                                                 |                                                                                         |                              |         |
|-----------------------|-----------------------------------------------------------------------------------|-------------------------------------------------|-----------------------------------------------------------------------------------------|------------------------------|---------|
|                       |                                                                                   |                                                 | (N <sub>2</sub> H <sub>4</sub><br>H <sub>2</sub> O)                                     |                              |         |
|                       | Fe <sub>2</sub> O <sub>3</sub>                                                    | 250 °C, 25 bar,<br>1.0 V                        | 35% (N <sub>2</sub><br>conversion<br>rate)                                              | Salicylic<br>method          | Ref. 13 |
|                       | Pt plate/ionic<br>liquids, THF,<br>ethanol/ N <sub>2</sub> , Ni<br>plate          | room temperature                                | 1.7%<br>(current<br>efficiency)                                                         | Berthelot<br>method          | Ref. 14 |
|                       | Pt plate/0.1 M<br>HCl/ N <sub>2</sub> ,<br>amorphous-<br>Au/CeO <sub>x</sub> -RGO | room temperature<br>and atmospheric<br>pressure | 8.3 ug h <sup>-1</sup><br>mg <sup>-1</sup> and<br>10.10%<br>Faradaic<br>efficiency (FE) | Indophenol<br>blue<br>method | Ref. 15 |
| <b>Photocatalysis</b> | BiOBr, H <sub>2</sub> O<br>(sacrificial agent)                                    | $\lambda > 420$ nm                              | 1.08 ppm<br>(1 h)                                                                       | Nessler's<br>reagent         | Ref. 16 |
|                       | Diamond, KI<br>(sacrificial agent)                                                | $\lambda > 190$ nm                              | 0.8 ppm<br>(24 h)                                                                       | Indophenol<br>blue<br>method | Ref. 17 |

## References:

1. Chen, S. M.; Perathoner, S.; Ampelli, C.; Mebrahtu, C.; Su, D. S.; Centi, G., Electrocatalytic Synthesis of Ammonia at Room Temperature and Atmospheric Pressure from Water and Nitrogen on a Carbon-Nanotube-Based Electrocatalyst. *Angew. Chem. Int. Ed.* **2017**, 56, 2699-2703.
2. Han, L.; Liu, X.; Chen, J.; Lin, R.; Liu, H.; Lu, F.; Bak, S.; Liang, Z.; Zhao, S.; Stavitski, E.; Luo, J.; Adzic, R. R.; Xin, H., Atomically Dispersed Mo Catalysts for High - Efficiency Ambient N<sub>2</sub> Fixation. *Angew. Chem. Int. Ed.* **2019**, 58, 2321-2325.
3. Bao, D.; Zhang, Q.; Meng, F. L.; Zhong, H. X.; Shi, M. M.; Zhang, Y.; Yan, J. M.; Jiang, Q.; Zhang, X. B., Electrochemical Reduction of N<sub>2</sub> under Ambient Conditions

for Artificial N<sub>2</sub> Fixation and Renewable Energy Storage Using N<sub>2</sub>/NH<sub>3</sub> Cycle. *Adv. Mater.* **2017**, 29, 1604799.

4. Kresse, G.; Furthmuller, J., Efficiency of ab-initio Total Energy Calculations for Metals and Semiconductors using a Plane-wave Basis set. *Comp. Mater. Sci.* **1996**, 6, 15-50.

5. Kresse, G.; Furthmuller, J., Efficient Iterative Schemes for ab initio Total-energy Calculations Using a Plane-wave Basis set. *Phys. Rev. B* **1996**, 54, 11169-11186.

6. Hammer, B.; Hansen, L. B.; Norskov, J. K., Improved Adsorption Energetics Within Density-functional Theory Using Revised Perdew-Burke-Ernzerhof functionals. *Phys. Rev. B* **1999**, 59, 7413-7421.

7. Blochl, P. E., PROJECTOR AUGMENTED-WAVE METHOD. *Phys. Rev. B* **1994**, 50, 17953-17979.

8. Kresse, G.; Joubert, D., From Ultrasoft Pseudopotentials to the Projector Augmented-wave Method. *Phys. Rev. B* **1999**, 59, 1758-1775.

9. Lu, Y. F.; Li, J.; Tada, T.; Toda, Y.; Ueda, S.; Yokoyama, T.; Kitano, M.; Hosono, H., Water Durable Electride Y<sub>5</sub>Si<sub>3</sub>: Electronic Structure and Catalytic Activity for Ammonia Synthesis. *J. Am. Chem. Soc.* **2016**, 138, 3970-3973.

10. Cui, B. C.; Zhang, J. H.; Liu, S. Z.; Liu, X. J.; Xiang, W.; Liu, L. F.; Xin, H. Y.; Lefler, M. J.; Licht, S., Electrochemical Synthesis of Ammonia Directly from N<sub>2</sub> and Water over Iron-based Catalysts Supported on Activated Carbon. *Green Chem.* **2017**, 19, 298-304.

11. van der Ham, C. J. M.; Koper, M. T. M.; Hetterscheid, D. G. H., Challenges in



Reduction of Dinitrogen by Proton and Electron Transfer. *Chem. Soc. Rev.* **2014**, 43, 5183-5191.

12. Shi, M. M.; Bao, D.; Wulan, B. R.; Li, Y. H.; Zhang, Y. F.; Yan, J. M.; Jiang, Q., Au Sub-Nanoclusters on TiO<sub>2</sub> toward Highly Efficient and Selective Electrocatalyst for N<sub>2</sub> Conversion to NH<sub>3</sub> at Ambient Conditions. *Adv. Mater.* **2017**, 29, 1606550.

13. Licht, S.; Cui, B. C.; Wang, B. H.; Li, F. F.; Lau, J.; Liu, S. Z., AMMONIA SYNTHESIS Ammonia Synthesis by N<sub>2</sub> and Steam Electrolysis in Molten Hydroxide Suspensions of Nanoscale Fe<sub>2</sub>O<sub>3</sub>. *Science* **2014**, 345, 637-640.

14. Pappenfus T. M.; Lee K.; Thoma L. M.; Dukart C. R., Wind to Ammonia: Electrochemical Processes in Room Temperature Ionic Liquids. *ECS Trans.* **2009**, 16, 89-93.

15. Li, S. J.; Bao, D.; Shi, M. M.; Wulan, B. R.; Yan, J. M.; Jiang, Q., Amorphizing of Au Nanoparticles by CeO<sub>x</sub>-RGO Hybrid Support towards Highly Efficient Electrocatalyst for N<sub>2</sub> Reduction under Ambient Conditions. *Adv. Mater.* **2017**, 29, 1700001.

16. Li, H.; Shang, J.; Ai, Z. H.; Zhang, L. Z., Efficient Visible Light Nitrogen Fixation with BiOBr Nanosheets of Oxygen Vacancies on the Exposed {001} Facets. *J. Am. Chem. Soc.* **2015**, 137, 6393-6399.

17. Zhu, D.; Zhang, L. H.; Ruther, R. E.; Hamers, R. J., Photo-illuminated Diamond as a Solid-state Source of Solvated Electrons in Water for Nitrogen Reduction. *Nature Mater.* **2013**, 12, 836-841.
